# Supplementary material
Source: PubMed Central journal article supplement (PMC3039021)
Supplement: supp_124_5_812__1.pdf [file supp_124_5_812__1.pdf]

| Gene Symbol   | Description                                                                                                        | Score | Rank | siRNA sequence 1       | siRNA sequence 2       | siRNA sequence 3       | siRNA sequence 4       |
|---------------|--------------------------------------------------------------------------------------------------------------------|-------|------|------------------------|------------------------|------------------------|------------------------|
| ACP1          | acid phosphatase 1, soluble                                                                                        | 25    | 42   | CCCATAGTGACACTTGTATA   | TCCGTAGGAGCTCACAGTCTA  | TCCGTGTGTAATCACGTTCCA  | ATGGATGAAAGCAATCTGAGA  |
| ACP2          | acid phosphatase 2, lysosomal                                                                                      | -17   | 185  | CAGCCTGAAGTCTTCGGCAAA  | CTGGATGCTACAATGGTGAA   | ACCAGTGAAGACATATCCCAA  | CAGCGCTATCACGGCTTCCTA  |
| ACP5          | acid phosphatase 5, tartrate resistant                                                                             | 25    | 43   | CTCGGGCAAGTCCCTCTTTAA  | CTGGTACGTGCTAGCCGGAAA  | ACGGCGTGTCTCATCTGCAA   | CACTGGTGTGCAAGACATCAA  |
| ACP6          | acid phosphatase 6, lysophosphatidic                                                                               | -8    | 176  | CCATGTCAGTTTATACCTTAA  | CCCCTGGACATGTTCTTGAA   | GTGCCCTTATACAATGCCAAA  | GAGGCCAAACTTGAATACAA   |
| ACPP          | acid phosphatase, prostate                                                                                         | +2    | 20   | ACAGATGGCGCTAGATGTTTA  | CCGGACTTTGATGAGTGCTAT  | CTCTATTACCATTATGGATAA  | ATGAACAGGTTTATATTCGAA  |
| ACPT          | acid phosphatase, testicular                                                                                       | 0     | 128  | CCCGCAAAGATGGAGGGAAT   | CTGGTGTTCGTGGCTCTGGTA  | CTGCTGAATGCTATCCTTGCA  | CAGGGCATGGAAGGTTCTGGA  |
| ALPI          | alkaline phosphatase, intestinal                                                                                   | 58    | 9    | CACGTCCATCTGTACGGCAA   | TCCATTCTCCTAGGAGACAAA  | CCAGACAATAAAGGGACCAA   | CCGGCTACGTGTCAACTCA    |
| ALPL          | alkaline phosphatase, liver/bone/kidney                                                                            | 25    | 44   | CAGGATTGGAACATCAGTTAA  | CCGGGACTGGTACTCAGACAA  | CAGACTGCAGACATTCCTCAA  | CACCATGATTTACCATTCTT   |
| ALPPL2        | alkaline phosphatase, placental-like 2                                                                             | 17    | 70   | CTGGGAAACACAAAGCAATAA  | TTGCTTTATCTTGTCTCTGAA  | ATCGACCATTGGTCATCATGAA | CACGGTCTCTTATACGGAAA   |
| CDC25A        | cell division cycle 25A                                                                                            | 17    | 71   | AAGGCGCTATTTGGCGCTTCA  | AAGGGTTATCTCTTTCATACA  | CAGCTTAGCTAGCATTAATAA  | CTGGCCAAATAGCAAAGACAA  |
| CDC25B        | cell division cycle 25B                                                                                            | 50    | 13   | CAGGAGGCTGAGGAACCTAAA  | CCCAGTCTGTTGAGTTAGTTA  | CGCCGAGAGCTTCTACTGAA   | TTGGGTTAATACCAGCTTAAA  |
| CDC25C        | cell division cycle 25C                                                                                            | 17    | 72   | CAGGAAGGGCTTATGTTTAAA  | CCAGAGCTATATATCTTAAA   | CCAGGGAGCCTTAAACTTATA  | GAGCTGCAATCTAGTTAACTA  |
| CDKN3         | cyclin-dependent kinase inhibitor 3 (CDK2-associated dual specificity phosphatase)                                 | 25    | 45   | CACAATCAAGATCTGTATCAA  | TCCGGACAAATTAGCTGCACA  | CACCAGTGTATCAACTTGAA   | CTAGCATAAATTTGATTTGAAA |
| CTDP1         | CTD (carboxy-terminal domain, RNA polymerase II, polypeptide A) phosphatase, subunit 1                             | 0     | 129  | CCGGCTGTACGCACACACCAT  | CTCCATGGTTTGCATTATTGA  | CCCACAAACTTCCCGATAGA   | CCGAATATTATCAAGGGATGA  |
| CTDSP2        | CTD (carboxy-terminal domain, RNA polymerase II, polypeptide A) small phosphatase 2                                | 8     | 94   | CCCGGAAACAGCGGGAAGTAA  | TACGATCAGCGTGACAGAGTA  | CCACCTAGCCATAGTCTCAAA  | CTGCGTATAAGGAGGAAGCAA  |
| CTDSPL        | CTD (carboxy-terminal domain, RNA polymerase II, polypeptide A) small phosphatase-like                             | 8     | 95   | CCAGTGCACAGCTCAGCTTAAA | TACGCCAACTCTTTAGCCAA   | TAGGAAATGCTACATCGCGAA  | TTCGTTTAAAGCTATTAGTAA  |
| DKFZP566K0524 | DKFZP566K0524 protein                                                                                              | 17    | 73   | CCCACCCTAACACTTAAACATA | CTGGTGACAAGCTATACCTAA  | TTGAATTTGGTTGAATAATTAA | TCACCTCTGTTGAAACATTTA  |
| DOLPP1        | dolichyl pyrophosphate phosphatase 1                                                                               | 0     | 130  | AAGAATGCACCAAACAACAA   | CAGGGTCTACCTGCTGTACCA  | GAGGTGGTTTGAATTTAAGAAA | CAGGATGGACAGGATGACAGA  |
| DUSP10        | dual specificity phosphatase 10                                                                                    | 8     | 96   | ATGAGAATACAGGCTCTCTAA  | CAGGTTTATAGACCCGAAGATA | CAGGGCAGCTTAAGTGGTCTA  | CCGAAGATACTACACACTTTA  |
| DUSP11        | dual specificity phosphatase 11 (RNA/RNP complex 1-interacting)                                                    | 8     | 97   | CAGAACTGTCTCTTACTTAA   | CCCTTATGTATTCAAGCTTAA  | CACAATAAGCCTGTAAACAA   | ATGATGCAATTTGAATATTCA  |
| DUSP12        | dual specificity phosphatase 12                                                                                    | 0     | 131  | ATGCTTTACATGGCAATCAAA  | TACCGTTTCAACAAGGATTGAA | CTCAATGTACATCTTATTTCA  | CAAGCTCAATGTACATCTTAT  |
| DUSP13        | dual specificity phosphatase 13                                                                                    | +2    | 21   | ACCCTGAGATGTAACAGCAA   | TCAGTCCATCTCTATAATAAA  | ACCCAATTCAGAGATTCCTTA  | CAGGTGGACACAGGTGCCAAA  |
| DUSP14        | dual specificity phosphatase 14                                                                                    | 8     | 98   | AAGGGAATGCATACATTTGCTA | ACCCTTATTATTTAGCTGTTA  | CCCAGGATTATATTAGCATTA  | TAGCTGTTAAGTAACTATAAT  |
| DUSP15        | dual specificity phosphatase-like 15                                                                               | -42   | 208  | ACGGCCTGGAGGGTATTAAA   | CACCACGATTTGTACAGCGTA  | CTGGAGGTTATTAAGAGACA   | CCGAAATAAGATCACACACAT  |
| DUSP16        | dual specificity phosphatase 16                                                                                    | 0     | 132  | AAGTTGTAGTTTACGATCAA   | CCGCCATTTGTGGAATACAA   | CAGGACAAAGTGTAAATACA   | AACCCAGTTGTTACTCTCTTA  |
| DUSP18        | dual specificity phosphatase 18                                                                                    | 33    | 29   | ACGGTCTCTCTCCGAAGAA    | CCAGATCACCATTGGTCATCAA | CAGGAATGAATCTGCTACAA   | CAAGCTATGCTGTCTAGCAA   |
| DUSP19        | dual specificity phosphatase 19                                                                                    | -8    | 177  | ATGGTCAGTATCACTGGATAA  | CAGAGTTAACCTAATGAGTCA  | TACGGTCTCTTTCTCACATA   | AAGGTCATATATACTATACAA  |
| DUSP2         | dual specificity phosphatase 2                                                                                     | 33    | 30   | CAGCCTGAGAGCTCCAAGGAA  | CTGGTCCACCACCATTGTGAA  | AAACTTAGCACTTTATATTTA  | CGCGGAAAGACCCGAAAGGAA  |
| DUSP21        | dual specificity phosphatase 21                                                                                    | 0     | 133  | AACGTAGTAAGCCTTACCTTA  | TCCGTGGAAGTGGTCAACGTA  | ACCGGATGGTGCCTTGTAAA   | ACGTACGATGATATCAATGTA  |
| DUSP22        | dual specificity phosphatase 22                                                                                    | 0     | 134  | CATGTTTATGTTGAGAATAA   | GGGCAACTTAGCCAAGTTTAA  | AAGCAACATAGAGTTTAAGTA  | AAGCATGAGTCCATCAGTAT   |
| DUSP23        | dual specificity phosphatase 23                                                                                    | 0     | 135  | CAGTTCTACCAGCGAACGAAA  | GAAGTGGACTAAAGTATTAAA  | TTGGCTGAAGCACTGAAGTA   | CAGGAGATGCCATTTGCTGAAA |
| DUSP24        | dual specificity phosphatase 24 (putative dual specificity phosphatase 3 (vaccinia virus phosphatase VH1-related)) | -33   | 203  | AAGCTTCTGCACATCCGGATA  | CAAGATTCAGAAGGACTTGAA  | CACCCTGGAGATACTCTTAAA  | CTGCCTGAAAGTCTCATGTTA  |
| DUSP3         | dual specificity phosphatase 3 (vaccinia virus phosphatase VH1-related)                                            | -33   | 204  | CCCGGGATCTACGTGGGCAA   | CCGTATTTACTTAAACAGATT  | AACAGATTCGTTGGAAGCTTA  | TACGTTATTGTTATTATGGAA  |
| DUSP6         | dual specificity phosphatase 6                                                                                     | 25    | 46   | CTGCATTGCAGAGACCAATCTA | TACGGACACTATTTACTACTAA | TGCGGAAATGGTTAATACTAA  | TCAGCTGTGCTAAACAGTATA  |
| DUSP7         | dual specificity phosphatase 7                                                                                     | 33    | 31   | CAAGGTGGTTTCAACAAGTTT  | CGGCGCGAGTTCCACTACAA   | TACGACTTTGTCAAGAGGAAA  | GAAGATGAACCTGTCACTCAA  |
| DUSP8         | dual specificity phosphatase 8                                                                                     | +2    | 22   | CCGCTCCTTCGTGGAGTACAA  | TCCATCGAGTTCATCGATAAA  | CAGGCCGTTTATAAATGTATA  | GCGGGTGGTCTCGAGCTCTA   |
| DUT           | dUTP pyrophosphatase                                                                                               | +2    | 23   | AAGCCTTGGATGACACCGAAA  | TCCCTTCTCTTCACTAGTCTA  | AAGCCTGTATTTAACTCATAT  | AAAGCCTGTATTTAACTCATAT |
| ENPP1         | ectonucleotide pyrophosphatase/phosphodiesterase 1                                                                 | 8     | 126  | CACCGGCTCCTAATAACGGAA  | CAGATAAATACTATTCAATTTA | TGGCAAAACAGTAGACTTATA  | AAGCATGAAACTTTACCTTAT  |
| ENPP2         | ectonucleotide pyrophosphatase/phosphodiesterase 2 (autotaxin)                                                     | -33   | 205  | ATGGATCATATTGCTCGGAA   | CGGACTAGATATGATATCTTA  | AAGCCTTATAAACCAACTTTA  | CAGATATATTTAAGCCTTATA  |

|           |                                                                                                                                                                                                                                                                                              |     |     |                        |                        |                         |                        |
|-----------|----------------------------------------------------------------------------------------------------------------------------------------------------------------------------------------------------------------------------------------------------------------------------------------------|-----|-----|------------------------|------------------------|-------------------------|------------------------|
| ENPP3     | ectonucleotide pyrophosphatase/phosphodiesterase 3                                                                                                                                                                                                                                           | 0   | 136 | AACCTAATGTGTGATCTTCTA  | CTGGCTGTTAGGAGTAAATCA  | TAGCAATTTGGTACCTATGTA   | ATGGTTATAACAATGAGTTTA  |
| FBP1      | fructose-1,6-bisphosphatase 1                                                                                                                                                                                                                                                                | 0   | 137 | CTCGCTCTGCACAGCAGTCAA  | TTCTTAGAGAGCAGAAATAAA  | CCTGGTTATGAACATGTTAAA   | CTCCAACGACCTGGTTATGAA  |
| FBP2      | fructose-1,6-bisphosphatase 2                                                                                                                                                                                                                                                                | 0   | 138 | AGGACCCTAAATGAACGATAA  | CAGGTTATGCGCTGTACGGTA  | TCCACTTAATCACATACAGAA   | CTCAATGCTGACGCCATCAA   |
| FLJ32332  | likely ortholog of mouse protein phosphatase 2C eta                                                                                                                                                                                                                                          | -17 | 186 | CAGAGTGACTTTACAACCTTAA | CCCAGAGACTCGGATTATCAA  | CAGGATCTTGAACAGCCCAA    | TCGGATTATCAATGCAGAGAA  |
| G6PC      | glucose-6-phosphatase, catalytic (glycogen storage disease type I, von Gierke disease)                                                                                                                                                                                                       | 0   | 139 | CAGCAGGTGTATACTACGTGA  | TGGGATCCAGTCAACACATTA  | CTGGCTTATTTCCCATGTGTGA  | TAGCAGAGCAATCACCACCAA  |
| G6PC2     | glucose-6-phosphatase, catalytic, 2                                                                                                                                                                                                                                                          | 50  | 14  | CAGAGTATTATAGCAACACA   | CTGGTGGGTCCAAGAACTCA   | TGGTTAAACTTTATATTTAAA   | TTGGTTAAACTTTATATTTAA  |
| G6PC3     | glucose 6 phosphatase, catalytic, 3                                                                                                                                                                                                                                                          | 0   | 140 | CAGGTGCTGGCTGGCCTAATA  | GTGGCTCAACCTCATCTTCAA  | CACATGTTCAAGTCCCAGGAA   | CTGGGAAATGGCCAGAAGATA  |
| ILKAP     | integrin-linked kinase-associated serine/threonine phosphatase 2C                                                                                                                                                                                                                            | 0   | 141 | ATGGAGGAATTCGAGCCTCAA  | CCCCTAGCAGTGGCGATTCA   | TCGGGCAATCTTGTGTCGTTA   | TTCGGTGATCTTTGGTCTGAA  |
| IMPA1     | inositol(myo)-1(or 4)-monophosphatase 1                                                                                                                                                                                                                                                      | -17 | 187 | ACGAAGAGTAATTCGTGCAAA  | CCGGAAGAGACGAGTGC GGTA | TAGAAAGTTAACTGTTTGGAA   | CCAGATTTGGTGACTCATCAA  |
| INPP1     | inositol polyphosphate-1-phosphatase                                                                                                                                                                                                                                                         | 50  | 15  | CCGTAATTAGTACAAGTGAAA  | TAGATTTCAACTTATCAGTATA | CTGATGGGAGTCATCAATCAA   | CACCAGCAGCTGCAACTGAAA  |
| INPP4B    | inositol polyphosphate-4-phosphatase, type II, 105kDa                                                                                                                                                                                                                                        | 8   | 99  | AACGATTTGCGCCAAACTGAA  | CCCGGAAAGTGTGAGCGGAAA  | ATCGATGTCAGTGACACTTGA   | CTCCATAGATTTGAAACAGAA  |
| INPP5A    | inositol polyphosphate-5-phosphatase, 40kDa                                                                                                                                                                                                                                                  | 8   | 100 | CGGAAGGTTATGCTCCAGTTA  | TCGAGTGATGCGATGAAAGAA  | AACAATAATATCATGGGAGAA   | CGAGTGCAAAATGGTCAAGAAA |
| INPP5B    | inositol polyphosphate-5-phosphatase, 75kDa                                                                                                                                                                                                                                                  | 33  | 32  | TTGCGGGAACATACAATGTAA  | AAGAAGAGGATTACACCTATA  | GAGGGCAATACAGGCATTTAA   | CTGCGAGATACAATTTGTGAAA |
| INPP5D    | inositol polyphosphate-5-phosphatase, 145kDa                                                                                                                                                                                                                                                 | 0   | 142 | CAGGTGCTATGCCACATGAA   | TCCCATCAACATGGTGTCCAA  | CCCGGGACTGTTGACAGCCAA   | TCGGAATTCGCTTTACTCTTA  |
| INPP5E    | inositol polyphosphate-5-phosphatase, 72 kDa                                                                                                                                                                                                                                                 | -23 | 197 | ACGCATCGTGTCTCAGATCAA  | ACGGATTTTCGAAGGAGATTCA | CACGTACGACAGCACCTCCAA   | CAGAAATGTCCCAGACCCAA   |
| INPP5F    | inositol polyphosphate-5-phosphatase F                                                                                                                                                                                                                                                       | 50  | 16  | AAGACCTTTACGCATATTTAA  | CAGATCTTCCATGGTGGCTTA  | CTGAAATAATGTGTTTCTGAA   | TACCATCTCTGATGACTCAA   |
| ITPA      | inosine triphosphatase (nucleoside triphosphate pyrophosphatase)                                                                                                                                                                                                                             | 8   | 101 | CTGGAGAAGTTAAAGCCTGAA  | CTGGATGAGACTTGTTCCTCAA | GAGGAGGTCGTTTCAGATTTCTA | CAGGAGGCAGTTCCAGGTA    |
| LHPP      | phospholysine phosphohistidine inorganic pyrophosphate phosphatase similar to protein tyrosine phosphatase, receptor type, Q isoform 1 precursor; glomerular mesangial cell receptor protein-tyrosine phosphatase; glomerular mesangial cell receptor protein-tyrosine phosphatase precursor | 8   | 102 | CAGGAGGAACTAACAGTTCA   | CCCAGTCACCTTTCAGACAA   | CCCGGTGTGTGCAGGAGGAAA   | ACCACTCACCATGGGCCTTTA  |
| LOC387870 | similar to Osteotesticular phosphatase; protein tyrosine phosphatase receptor type V; protein tyrosine phosphatase receptor type W; protein tyrosine phosphatase, receptor type, V                                                                                                           | 19  | 67  | TAGCAGAAAGAGGAACCTTAA  | CACGATATGTTTGTCTTGAA   | CCAGGTGGTATTGTTAAAGTA   | CAGGATCGTGTTCACAAGGAT  |
| LOC389772 | similar to SET-binding factor 1 (Sbf1) (Myotubularin-related protein 5)                                                                                                                                                                                                                      | 0   | 143 | TACATTCTAGTAAGCATCTTA  | TAGTTTAAATATATACAATAA  | AAAGCAATATGTAATCTTAA    | AACATTATGTTGTATAGTTTA  |
| LOC390997 | similar to protein tyrosine phosphatase, receptor type, U isoform 2 precursor; protein tyrosine phosphatase J; protein tyrosine phosphatase receptor omicron; pi R-PTP-Psi                                                                                                                   | 0   | 144 | CAACCGCATGTTGACCACCAA  | GAGGACGCCCATGTTCTACAA  |                         |                        |
| LOC391025 | similar to TPTE and PTEN homologous inositol lipid phosphatase isoform alpha; TPTE and PTEN homologous inositol lipid phosphatase                                                                                                                                                            | 56  | 12  | CTCATTAATTATGATTATTGA  | CAAAGGATTCGGAACAGAAA   | CAGGAGGGTCTGTTGGCTCA    | CAGATGAGTCTCAGCACAAAT  |
| LOC400927 | similar to fructose-1,6-bisphosphatase 2; fructose-1,6-bisphosphatase isozyme 2; D-fructose-1,6-bisphosphate 1-phosphohydrolase; FBPase; muscle fructose-bisphosphatase; hexosediphosphatase                                                                                                 | 17  | 74  | TCCAGGTGATCTGAACCTGAA  | ATGGATGTTCTTCTTCGAGTA  | TCCACAGACAACGAATTTAA    | CTGGTGTCCACCTATCAGTAAA |
| LOC442428 | similar to SUMO1 pseudogene 3                                                                                                                                                                                                                                                                | 25  | 47  | CAACATTTGTGACCATAGTTTA | CAAGATTAGTAAGAAAGGAAA  | CAGCCTTATGGACTCTCTCAA   | CACCTGGATGCTACCAGGCTA  |
| LOC474338 | SUMO1 pseudogene 3                                                                                                                                                                                                                                                                           | -8  | 178 | CAGGCTTGTGGTGATAAATAA  | AAGGAAGGTGAATATATTTAA  | CTCATTAATTCATTAATGTTTA  | CAGAGAATTGCTGATAATCAT  |
| LOC642940 | similar to myotubularin related protein 9 lipid phosphate phosphatase-related protein type 2                                                                                                                                                                                                 | -6  | 175 | CCGTGCGGTGATCGTGCCATA  | CTCGGAGCAAAGCATGGACAA  |                         |                        |
| LPPR2     | multiple inositol polyphosphate histidine                                                                                                                                                                                                                                                    | 0   | 145 | CCCGTGTCTAAGCATGTGCAA  | CCGGGACAACCTCAGCCCTTA  | CTGCGTTGTGCATAACTTTCA   | CCCGTGGCCGAGTACCAGAAA  |
| MINPP1    | multiple inositol polyphosphate histidine                                                                                                                                                                                                                                                    | -42 | 209 | CACGGTCAAAACAGATCCGCAA | CCGAGTGCAGATGTTATTTAA  | AAGTCGGAAAAGTACAATGAAA  | ATGAAATCTTCTACTTATA    |

|                |                                                                                                           |     |     |                                                       |                                                        |                        |                        |
|----------------|-----------------------------------------------------------------------------------------------------------|-----|-----|-------------------------------------------------------|--------------------------------------------------------|------------------------|------------------------|
|                | phosphatase, 1                                                                                            |     |     |                                                       |                                                        |                        |                        |
| M-RIP          | myosin phosphatase-Rho interacting protein                                                                | 25  | 48  | AAGCGGGACTTCACCAATGAA                                 | CCGGACCAACAAGCAGAATCA                                  | CGGGAGCTAGAGAACTTCGA   | GCGACGGTTCTTCATCCTTTA  |
| MTM1           | myotubularin 1                                                                                            | 25  | 49  | CGAATAGGTCATGGTGATAAA<br>not disclosed -<br>validated | TCCGGTATGAGTGGGAAACGAA<br>not disclosed -<br>validated | GACATTGTTTATCCTAATGTA  | CGGTATGAGTGGGAAACGAAA  |
| MTMR1          | myotubularin related protein 1                                                                            | 25  | 50  |                                                       |                                                        |                        |                        |
| MTMR2          | myotubularin related protein 2                                                                            | 25  | 51  | AACGATATGAACTTTGTGATA                                 | CTGAGGGAGTCTAACAGTTA                                   | ACCACTGCAATTCACATTATA  | TAGGATGAGTTTAGAACTGTA  |
| MTMR3          | myotubularin related protein 3                                                                            | 0   | 146 | GACCCTTATTACCGAACCATA                                 | TTGCCTTTAGCCGAATGTAAA                                  | CAGCCTTAAATCAAGAATATT  | AGCATGTAACTTCAAGTTTA   |
| MTMR4          | myotubularin related protein 4                                                                            | 17  | 75  | TCCGGCACTGGAGAGTACCAA                                 | TTGCCATAGATGTAACCTAAA                                  | AAGAGTGGCTCTCACGGCTAA  | CCGGCTGCATATCAAATCAA   |
| MTMR5          | myotubularin related protein 5; SET binding factor 1                                                      | 0   | 147 | CAGCGCCGAGCTCTCCGTAA                                  | CCGCGTGGTGTGGCCCTGTTA                                  | TCCGGTCGTTACCGACCACTA  | GACGCCTGTGTCCACAATTA   |
| MTMR6          | myotubularin related protein 6                                                                            | 33  | 33  | CCCGGATAGCAAGCAAACCAA                                 | CCCGTAAATGATGCTCTTCGA                                  | TACAAAGTTACTGTTAACAA   | AAGGGAAGTACAGATAGTTA   |
| MTMR7          | myotubularin related protein 7                                                                            | 17  | 69  | CACCGATATGGCAATCTAGAT                                 | CACGCGGATGGGCTCCCTAA                                   |                        |                        |
| MTMR8          | myotubularin related protein 8                                                                            | 8   | 103 | CAGCCCAAGCAGAGTATGCTA                                 | CGGGAAGATCTAAGAGTCTAT                                  | GGGAATTACTTTACTGATTAA  | TGCCATGAGGTTTATATTTCA  |
| MTMR9          | myotubularin related protein 9                                                                            | 8   | 104 | CAGACCTAGTATTCTAAGTTA                                 | CAGGTCTAAGGATTAACATA                                   | ATGCCTGAACCTGTTATCTAA  | TACGTTGGAATAGATCCTCTA  |
| MTMR10         | myotubularin related protein 10                                                                           | 0   | 148 | CTCGATGGTTAGAATATGTAA                                 | CAACCAGAACTGAAATTTAA                                   |                        |                        |
| MTMR11         | myotubularin related protein 11                                                                           | 0   | 149 | CAGGGTCCCTGCATAAAATTTA                                | CACCCTTACTTCTCTGAGAAA                                  |                        |                        |
| MTMR12         | myotubularin related protein 12                                                                           | 6   | 127 | CAGATAGCCCTGTATATACCTA                                | CTGTGAGAGATTGCCAGCATA                                  |                        |                        |
| MTMR13         | myotubularin related protein 13                                                                           | 0   | 150 | CCAGATTATATTATCCAGAAA                                 | AAGGGTAACCGTGGACCTTAA                                  |                        |                        |
| MTMR14         | myotubularin related protein 14; hJUMPY                                                                   | 0   | 151 | AAGGAATATAAAGATCGGGAT                                 | GACGGTTTGTCTGCCAGTAA                                   |                        |                        |
| MTMR15         | myotubularin related protein 15                                                                           | 13  | 93  | CTGGTCAGAAGTTATATGTAA                                 | CAGGTTGGCTTAATAAAATCA                                  |                        |                        |
| PDP2           | pyruvate dehydrogenase phosphatase isoenzyme 2                                                            | 8   | 105 | CAGGACGATCATCATGGAGGA                                 | TAGACAGGACAGGTTAATTTA                                  | CAGGAATTAGACCATATTTAG  | CCCATCCTATTGTCAAGGTTA  |
| PDP2           | pyruvate dehydrogenase phosphatase regulatory subunit                                                     | 58  | 10  | ACCACATAGCCCAGTGATTAA                                 | ATCTCTTATCTCCTTGATATA                                  | TAGCTACAAGATTACAGCTTTA | TTGGAGCAAGTATGTACTTAA  |
| PDPR PHOSPH O1 | phosphatase, orphan 1                                                                                     | -8  | 179 | CGCCAACATGTGCAAGCACAA                                 | TCCGGTCCGGACAGCCAGTAA                                  | TACAACATAAAGGAGGTGAA   | CCGTCCCTATCTATTCAAGTTA |
| PHPT1          | phosphohistidine phosphatase 1                                                                            | 17  | 76  | CACGCCATTTCAACTGAGAAA                                 | TCCGGCGACATGCAGAAGCAA                                  | CCGATTCCACGTTTCTTTAA   | TAGCCTGGCCACAGAATAAA   |
| PIB5PA         | phosphatidylinositol (4,5) bisphosphate 5-phosphatase, A                                                  | 25  | 52  | CAGGTAACATTTCAGTGAGGAA                                | CTGGGACTGGATCGGCTTATA                                  | CTGGAGGTCATCCATTAGGAA  | ATGGGAATACCTACCAGGTAA  |
| PIP3AP         | phosphatidylinositol-3-phosphate associated protein                                                       | 0   | 152 | CAGGGTCATGGCATAACCAATA                                | TGGGATGTGGATTATGCTTAA                                  | CCGGCACTCCGTTAGAATAAA  | CCCGGCACTCCGTTAGAATAA  |
| PLIP           | PTEN-like phosphatase                                                                                     | 17  | 77  | CAGCTCGCGCTCAGCACAGTA                                 | CACCTTGGACAACCTCCAGAA                                  | AACCTCCAGAAGGGAGTCCAA  | CAGGAGTGGAAAGAGACTAGGA |
| PME-1          | protein phosphatase methylesterase-1                                                                      | 33  | 34  | AACATCGAGCTCTGTGTGAAA                                 | AGGCGATACATCTGAGTTCAA                                  | AGGAAGGAAGTGAAGTCTATA  | ACGGCAGCGATTATTAGTAGA  |
| PNKP           | polynucleotide kinase 3'-phosphatase                                                                      | 17  | 78  | CACGTGAACAGGGACACGCTA                                 | CACGTGTGAGACAGCCCTGAA                                  | CGGGAAGTCCACCTTTCTCAA  | CAAGCTGGTGATCTTCAACAA  |
| PPAP2A         | phosphatidic acid phosphatase type 2A                                                                     | 8   | 106 | AACCCGTCTGTCTTACTGTAA                                 | CTGACATTTGCCAAGTATTTAA                                 | CATGCTGTTTGTGGCACTTTA  | CCGGGCAGAGACCATGTTTGA  |
| PPAP2B         | phosphatidic acid phosphatase type 2B                                                                     | 8   | 107 | AGCGATCGTCCCGGAGAGCAA                                 | CAGCACAAATTTCAGAAGAAAT                                 | CCGGATCTATTACCTGAAGAA  | CCGGGCACCTTGCATACTTTA  |
| PPAP2C         | phosphatidic acid phosphatase type 2C                                                                     | 8   | 108 | CCGGGTCAACTGCTCGGTCTA                                 | TCGCTCGGACTTCAACAACCTA                                 | ACCCCGTGTCTGATTACAAA   | CATGGTGTCTTGGCGCTGTA   |
| PPEF1          | protein phosphatase, EF hand calcium-binding domain 1                                                     | 17  | 79  | CAGCATTAGTACCTACATATT                                 | CCCAATCGGTACAATCGTTGA                                  | ATCGAATATGCTGATGAACAA  | CTGGGAAACCCCTCTTCAATAA |
| PPEF2          | protein phosphatase, EF hand calcium-binding domain 2                                                     | 8   | 109 | CACATGAATATCGACATTACA                                 | CTGCAGGAGCATTGGCGTTAA                                  | CCCACAAGCTACAAATGCTAA  | CGGAGCATTGATTTCACAAAA  |
| PPFIA1         | protein tyrosine phosphatase, receptor type, f polypeptide (PTPRF), interacting protein (liprin), alpha 1 | 0   | 153 | AACGGCCTATTTAATATGTTA                                 | CACGAGGTTGGTCTGAAAGA                                   | CTGGTGTTTCCGAGACGGATA  | TTCCAAGGTACAAACTTTAA   |
| PPFIA2         | protein tyrosine phosphatase, receptor type, f polypeptide (PTPRF), interacting protein (liprin), alpha 2 | 0   | 154 | AACGTTTGGGTGACTCATGAA                                 | TACCAGCTGGATTAGGTTAA                                   | TCCAATGAACGCTTACAACCTA | ACCGATGAAACTAGTCAATAA  |
| PPFIA3         | protein tyrosine phosphatase, receptor type, f polypeptide (PTPRF), interacting protein (liprin), alpha 3 | 25  | 53  | ACGGCTCAACTATGACCCGAA                                 | CACGGGTAAAGAGAAGTGTTT                                  | TCGAATGTTAGATCACCTTAA  | CTGGTGGACGCTCGAATGTTA  |
| PPFIA4         | protein tyrosine phosphatase, receptor type, f polypeptide (PTPRF), interacting protein (liprin), alpha 4 | 25  | 54  | CAGGATAGCTGGGTCCATTCA                                 | TGGGTGTGTACTGTTACCAATAA                                | CAGGGACTCAGTCCAGATTAT  | TCCCTGGGTAATGGATGGTAA  |
| PPM1A          | protein phosphatase 1A (formerly 2C), magnesium-dependent, alpha isoform                                  | -58 | 214 | AAGCGTGATTTCAAACCATAA                                 | TTCCATGAGTATTGCAGGTAA                                  | CAAACCATAATTCGTGTTGTA  | TAAGCGTGATTTCAAACCATA  |
| PPM1B          | protein phosphatase 1B (formerly 2C), magnesium-dependent, beta isoform                                   | 17  | 80  | CACCTAAGCATATCTACTTTA                                 | CGAGATAACATGAGTATTGTA                                  | CAACCAAGTGTTTAGAATGAA  | TAGCCTAACTACACACATCAA  |
| PPM1D          | protein phosphatase 1D magnesium-dependent, delta isoform                                                 | 8   | 110 | ACGGGTCTTCCCTAGCACATCA                                | CTCGCGTCTGTCGAAGATAAA                                  | ATGGCCAAGGGTGAATTTCTAA | TACATGGAGGACGTTACTCAA  |

|           |                                                                                                                                 |      |     |                        |                        |                        |                        |
|-----------|---------------------------------------------------------------------------------------------------------------------------------|------|-----|------------------------|------------------------|------------------------|------------------------|
| PPM1E     | protein phosphatase 1E (PP2C domain containing)                                                                                 | 0    | 155 | CCCATTTAGTCTGTACTAAA   | GAGGCGGTTTATAGTCAGAAA  | TTGGTTCATAAACTAGATAA   | CCGCCTAATCATGTGTTTATA  |
| PPM1F     | protein phosphatase 1F (PP2C domain containing)                                                                                 | 0    | 156 | ATGGTTGGCCACAACAATGA   | CACCTGGTGGTCTGATTCATA  | ACCAAGTATTGCTTGGCTTAA  | CAGGTGGTGTTAATAAGCCAT  |
| PPM1G     | protein phosphatase 1G (formerly 2C), magnesium-dependent, gamma isoform                                                        | 8    | 111 | CAGGACCTGAGGACTCAACTA  | CCAGAGGATGAAGTAGAACTA  | TACTCTGTGAACTTTATTTAA  | GAAGTTGTAGATTTTCATTCAA |
| PPM1L     | protein phosphatase 1 (formerly 2C)-like                                                                                        | 8    | 112 | CAGGACTACGAGAAAGACAAA  | CTGGTGGTCTTAGTCTATAA   | AAGCGTGAACCCATATTGATA  | CTGTAGAGTCACATATATGAA  |
| PPM2C     | protein phosphatase 2C, magnesium-dependent, catalytic subunit                                                                  | 8    | 113 | ACCGATTAAGGCCACAGGATA  | CAAGATAGTAGTATTATTACA  | CAGAATATCATATAATGTTTA  | ATCGTACTTCTTATTTAGTAA  |
| PPP1CA    | protein phosphatase 1, catalytic subunit, alpha isoform                                                                         | 17   | 81  | AAGAGACGCTACAACATCAAA  | CCGCAATTCGCCAAAGCCAA   | CTGCCCTGCTGCTGCCCTATAA | CAGCGAGAAGCTCAACCTGGA  |
| PPP1CB    | protein phosphatase 1, catalytic subunit, beta isoform                                                                          | -17  | 188 | TACGAGGATGTCGTCCAGGAA  | TAGGAATATGGTCGGCTGAA   | AAGTATGTTGGTTAATAGGAA  | CACTATTGGATGTGATTTCTAA |
| PPP1CC    | protein phosphatase 1, catalytic subunit, gamma isoform                                                                         | 17   | 82  | AACATCGACAGCATTATCCAA  | CTGGTTATAACAGCAAAATGAA | CTGCGGTGAAGTTGAGGCTTA  | GAGGAGTAAGTGTACAATTGA  |
| PPP1R1 0  | protein phosphatase 1, regulatory subunit 10                                                                                    | -75  | 215 | CCCAGCCTGCTGAGAAAGATA  | CCGAAGGACCGTCACTACATA  | CACAGGATCAGCTGCACCTTAA | CAGCAACATCTAAGCCCTTGA  |
| PPP1R1 1  | protein phosphatase 1, regulatory (inhibitor) subunit 11                                                                        | 0    | 157 | AACATGAGTAGCGAACACTTA  | CGCCCTAACTTTGCTTGCTAA  | CAGAGATCAGTCAAATCCATA  | TGGCTTGAGATTGGTCACTTA  |
| PPP1R1 2A | protein phosphatase 1, regulatory (inhibitor) subunit 12A                                                                       | 0    | 158 | ATAGTACTCAACCATAAATTAA | CAGAAATTAACCCGTGAGTTAA | CAGGCAGGCTATGATGTTAAT  | AACGAAGAGCTCTAGAAAGAA  |
| PPP1R1 2B | protein phosphatase 1, regulatory (inhibitor) subunit 12B                                                                       | 17   | 83  | CAGGGTGTTCCTCTAAAGAA   | CGGGAGGTAGTAATCTACAA   | CTGGTTGTTGTTATATAGTTT  | TAGGAAGATCAGCATATTTAT  |
| PPP1R1 2C | protein phosphatase 1, regulatory (inhibitor) subunit 12C                                                                       | -8   | 180 | CAGCGGGACCTCAACCAGAA   | CAGGAGGACCTTCGGAACCAA  | CAGGCGCTTTGGCTCCTGAA   | TTGGAGGAACTGGCCCCGAAA  |
| PPP1R1 3B | protein phosphatase 1, regulatory (inhibitor) subunit 13B                                                                       | 50   | 17  | CGCGATGATGCCGATGATATT  | CGGGCTGAGAGTCCGGTTTAA  | CGCCTTAAATAAGTCAGTTAA  | ACCAGCGGGGGTGGAGTTAAA  |
| PPP1R1 4A | protein phosphatase 1, regulatory (inhibitor) subunit 14A                                                                       | -17  | 189 | CCCAGTACGATCAACATTTGAT | TTGTATTTAATGGTTCTGTAA  | TAATGGTTCGTACAATAAAA   | GCCAGCTTGCTTGTGTATAA   |
| PPP1R1 4C | protein phosphatase 1, regulatory (inhibitor) subunit 14C                                                                       | 0    | 159 | AAGAGCTGCTTTCTCGGATAA  | TAAAGTTGTATGAACCTTAA   | AACCTTAAATTTGAAGAACTA  | CCGCAGAAGAAGAGTGTATGA  |
| PPP1R1 4D | protein phosphatase 1, regulatory (inhibitor) subunit 14D                                                                       | -25  | 198 | CAGGAGCTCTTCCAGGATCAA  | CCGCCGTGACAGTGAAGTATGA | CAGGCCTGCCCTGAAACTCCA  | GAGCCTGAGATTGACCTGGAA  |
| PPP1R1 5A | protein phosphatase 1, regulatory (inhibitor) subunit 15A                                                                       | 0    | 160 | CCAGTTGTTGATCTTATGCAA  | TGGGTTTATATAAGGAATAAA  | GTGGGTTTATATAAGGAATAA  | CAGGATCAGCCGAGGATGAAA  |
| PPP1R1 5B | protein phosphatase 1, regulatory (inhibitor) subunit 15B                                                                       | -25  | 199 | AAGGTGCTAATTTGAGGCCAA  | CAGGGTTACTACCTCAGTTTA  | AAGGCTTGTACAGACAGGTA   | CAGGTTTATTGTGTCTACTA   |
| PPP1R1 6B | protein phosphatase 1, regulatory (inhibitor) subunit 16B                                                                       | -100 | 216 | ACGGGGCAGAGTAGCAGTGAA  | TCGCAGATCTTTGATATCGTA  | CAGGCAATTTCTGTTCTGGAA  | ATGGAGCTAGTCTCAGTGCAA  |
| PPP1R1 A  | protein phosphatase 1, regulatory (inhibitor) subunit 1A                                                                        | 17   | 84  | AAGGATCACACCACAATGAA   | TTGCCAGATACATACCTAAA   | CAGGGAAGAGTTCTTCCCTTA  | GAGGAGGTATCTTGGGATCAA  |
| PPP1R1 B  | protein phosphatase 1, regulatory (inhibitor) subunit 1B (dopamine and cAMP regulated phosphoprotein, DARPP-32)                 | 33   | 35  | ATAAATCTTTGTAAATAACAA  | CAGCTTGTGTTGAGCCCTTGA  | CAGGGATTTGCCCTTCCAAAT  | CTGAGTCTCACCTGCAGTCTA  |
| PPP1R1 C  | protein phosphatase 1, regulatory (inhibitor) subunit 1C                                                                        | 67   | 7   | CTCGATCTGGAAATTACAGCTA | TTGGAAGTGGTTAGTACCTAA  | TAGGATTTATGTTATAGATAA  | AATGAGTTTAAATGACTTCAA  |
| PPP1R2    | protein phosphatase 1, regulatory (inhibitor) subunit 2                                                                         | 92   | 2   | CACTACACGACTGTAATAAAA  | TACCAC TGATTTAGAAACAAA | ATGAGATATATAATCAAAGTA  | TTGAATGAGATATATAATCAA  |
| PPP1R2 P9 | protein phosphatase 1, regulatory (inhibitor) subunit 2 pseudogene 9                                                            | 17   | 85  | ACGTACAGAGATTACGATTTA  | CTGGAGGGCGGTGGACGGCTA  | AACGAAGAATTTGAACATCAAA | CAAGATGTGAAGAGAAAGAAA  |
| PPP1R3 A  | protein phosphatase 1, regulatory (inhibitor) subunit 3A (glycogen and sarcoplasmic reticulum binding subunit, skeletal muscle) | 0    | 161 | CACATCAGTATAGGCCATCAA  | TCAGGTGGGATTAATCTGAA   | TAGGCCATCAATATCACAATA  | CAGAGGAAACTACTTCAAATA  |
| PPP1R3 B  | protein phosphatase 1, regulatory (inhibitor) subunit 3B                                                                        | 17   | 86  | CACCCAAGTTCTTATACGTTA  | CCCGCTAGATATGCCATTCAA  | CAGACAGTACTTTAAATGTTA  | CTAGGATGACATGATGTTATA  |
| PPP1R3 C  | protein phosphatase 1, regulatory (inhibitor) subunit 3C                                                                        | 0    | 162 | TACGATGAATTTCAACGACGA  | TCCGGAGAATCAAGATCTTAA  | TGGCCTTTATCGATGAATTA   | AGCCTTCAACCGATTACTTAA  |
| PPP1R3 D  | protein phosphatase 1, regulatory subunit 3D                                                                                    | -50  | 210 | CAGGTACCCACCAACTTTATA  | CTGAGTTAGGCAACTACTTAA  | AAGGATAGCTTTCTTCGGTAT  | TCAGGTGACTAGAGAATTTCA  |
| PPP1R3 F  | protein phosphatase 1, regulatory (inhibitor) subunit 3F                                                                        | -17  | 190 | CGGGTTGGTACCGCTGTGAA   | AACATGGATGATAACACCTTT  | ACCGAAGACCTGTATGAGAA   | CACAAATAGACTCTATGAGAA  |
| PPP1R7    | protein phosphatase 1, regulatory subunit 7                                                                                     | -25  | 200 | CACAAACCCAATGGCAATAAA  | TCAGATGCCGTTGCAATTA    | TTCAGATGCCGTTGCAATTA   | CCAGATCAAGAAGATTGAGAA  |
| PPP1R8    | protein phosphatase 1, regulatory (inhibitor) subunit 8                                                                         | 0    | 163 | CAGGCCAGGAACTGAAGAAA   | TACAAATAAAGATGCCCTAAA  | CTGCTGAAGTTTCTTATTTAA  | AACCTTGAAGCTGTAATGAA   |
| PPP1R9 A  | protein phosphatase 1, regulatory (inhibitor) subunit 9A                                                                        | -33  | 206 | CTCCAATGTCAACAGAATTAA  | GAGGGTAATATTTATCTCTTA  | AAGGATGATATCTTAAGTTA   | CTGCAGTTGGATGGAAATAAA  |

|          |                                                                                                         |     |     |                         |                        |                        |                        |
|----------|---------------------------------------------------------------------------------------------------------|-----|-----|-------------------------|------------------------|------------------------|------------------------|
| PPP1R9 B | protein phosphatase 1, regulatory subunit 9B, spinophilin                                               | 0   | 164 | CAACTCGAAGCTGGTCAGCAA   | CCCGGGAGGTGCGCAAGATTA  | CACTGAGGAATTTCCAATTCTA | CCGGGAGGTGCGCAAGATTAA  |
| PPP2CA   | protein phosphatase 2 (formerly 2A), catalytic subunit, alpha isoform                                   | 31  | 40  | ATGGAAGCTTGACGACTACTCTA | CAAACAATCATTTGGAGCTTAA | ACACCTCGTGAATACAATTTA  | CAGATACAAATTTACTTGTTTA |
| PPP2CB   | protein phosphatase 2 (formerly 2A), catalytic subunit, beta isoform                                    | 19  | 68  | CCGACAAATATCCCAAGTATA   | TGGGATCTGTCTTGGCATTAA  | ATGGAATTAGATGACACTTTA  | CACCGGATACAAACTACTTAT  |
| PPP2R1 A | protein phosphatase 2 (formerly 2A), regulatory subunit A (PR 65), alpha isoform                        | 25  | 55  | ACGGCTGAACATCATCTCTAA   | CTGGTGTCCGATGCCAACCAA  | CAGAGAAAATAAAGGTCTAGAA | TCCCATCTTGGGCAAAGACAA  |
| PPP2R1 B | protein phosphatase 2 (formerly 2A), regulatory subunit B (PR 65), beta isoform                         | 92  | 3   | CAGAAGTTAGGTCAAGATGAA   | CAGGAAATAACTACTAAGCAA  | CTGACGTTCTGTTTGAATATCA | TGGACCAATTTCTAGATACCAA |
| PPP2R2 A | protein phosphatase 2 (formerly 2A), regulatory subunit B (PR 52), alpha isoform                        | -8  | 181 | ATGGAAGGTATAGAGATCCCTA  | CTGCAGATGATTTGCGGATTA  | CTGCCGTGTCTGGCACTGAA   | AAGCGAGACATAACCCCTAGAA |
| PPP2R2 B | protein phosphatase 2 (formerly 2A), regulatory subunit B (PR 52), beta isoform                         | 25  | 56  | CAGGAAATGATTGGAATAGAA   | CAGGGACTACTTGACCCGTCAA | CCGGAAGATCCAAGCAACAGA  | CGGCTACAAATAACCTTATATA |
| PPP2R2 C | protein phosphatase 2 (formerly 2A), regulatory subunit B (PR 52), gamma isoform                        | 33  | 36  | ACCGCTCATTTCTTCGGAAA    | CCGGGACTACCTTACAGTCAA  | TACTGTACATCATAGATTTA   | GAGGTTATTCTCAGTGGATTA  |
| PPP2R2 D | protein phosphatase 2 (formerly 2A), regulatory subunit B, delta isoform                                | 0   | 165 | CAGAGACTACCTGTCCGGTGAA  | TAGGTGGTTACCACAACAGAA  | TTCATCCATATCCGATGTAAA  | CCGCTCCATTAAGAACAGTGA  |
| PPP2R3 A | protein phosphatase 2 (formerly 2A), regulatory subunit B", alpha                                       | 8   | 114 | ACCTGTAGTAAATCATGAACAA  | CAGGAGGATTTTCATCCCTCTA | ACCAAGGTAATCAAACATAA   | TAGCATAACATTACCAAGGTA  |
| PPP2R4   | protein phosphatase 2A, regulatory subunit B' (PR 53)                                                   | 33  | 37  | CTCCGGGTGGATGACCAAAATA  | CTGAGGTGGCTGTTTACCTAA  | CCGCTCCCTAAGGGTAACCTA  | CGGATTCATCCTTACCCCTCAA |
| PPP2R5 A | protein phosphatase 2, regulatory subunit B (B56), alpha isoform                                        | 29  | 41  | CAGCGTATTCTGATATAGTAA   | CTGTATCATGGCCATAGTATA  | CATGGCCATAGTATATTGTAA  | CATCAGTATAATATAATTTAA  |
| PPP2R5 B | protein phosphatase 2, regulatory subunit B (B56), beta isoform                                         | -50 | 211 | CCGCATGATCTCAGTGAATAT   | CCGGTTCATCTATGAATTCGA  | CCGGGAGCGTGAGTACCTCAA  | AAGCCAGGGTGGGAACCCCTAA |
| PPP2R5 C | protein phosphatase 2, regulatory subunit B (B56), gamma isoform                                        | 17  | 87  | AACGAGCTGCTTTAAGTGAAA   | CCCATTGGAACAAGTAAGAAA  | CTGCTACTTCAGTAAGAATAA  | CTGAAAATATTGGGAAGTATA  |
| PPP2R5 E | protein phosphatase 2, regulatory subunit B (B56), epsilon isoform                                      | -17 | 191 | CACCGGGATTGCAAATCTAAT   | CCGGTGATATTGACAATAGGA  | CTCGTTCTATATCTCATCACA  | AAGGACTTCAATCCAAAGTTT  |
| PPP3CA   | protein phosphatase 3 (formerly 2B), catalytic subunit, alpha isoform (calcineurin A alpha)             | -25 | 201 | TAGCGATATAGCATACCCAAA   | TCGGCCTGTATGGGACTGTAA  | CACGCTTCAGTACTATCTAA   | CTGACATATACTGGAATGTAA  |
| PPP3CB   | protein phosphatase 3 (formerly 2B), catalytic subunit, beta isoform (calcineurin A beta)               | -17 | 192 | AAGGGTTTGGATAGGATCAAT   | TAGGAGATTAGATAGATTCAA  | TAGTTTATTGTGAGTACTCAA  | CAGCCCCGAAAGAAATCATAA  |
| PPP3CC   | protein phosphatase 3 (formerly 2B), catalytic subunit, gamma isoform (calcineurin A gamma)             | 25  | 57  | CAGGCTTTCATCACTTATTA    | CCGAGGGTGTCTTATTTCTA   | CTGGACCGAATTAATGAGCGA  | CAGGAATAAGATCAGAGCCAT  |
| PPP3R1   | protein phosphatase 3 (formerly 2B), regulatory subunit B, 19kDa, alpha isoform (calcineurin B, type I) | -17 | 193 | ATCCTTTTAGTACAGCGAGTAA  | GCCCATATAAATGGTAATGGA  | TCCCTTTATAGTTTCTCTATA  | GAGCCTCATGAAGCCAACTAA  |
| PPP4C    | protein phosphatase 4 (formerly X), catalytic subunit                                                   | -17 | 194 | CGGACAATCGACCGAAAGCAA   | TCGCCAGATCACGAGGTCTA   | CTGGACGAGCATCTCCAGAAA  | CCAACTGGTGATGGAAGGTTA  |
| PPP4R1   | protein phosphatase 4, regulatory subunit 1                                                             | 0   | 166 | CAGGCGTTGTTAGATCAGTAT   | TGGGAGTGCCTGAGTCTTTAA  | AACTGGTAACTACAAATCTA   | CAGCTAGTAAATGAGAATGATA |
| PPP5C    | protein phosphatase 5, catalytic subunit                                                                | +2  | 24  | CCCGTTGGCCCACTGCATCAA   | CTCGTGGAAAACCACACTCAA  | CAAGGCCCTTCTGGAAAGAGAA | CACGGAGGCCCTGTTCACTGAA |
| PPP6C    | protein phosphatase 6, catalytic subunit                                                                | -8  | 182 | CACAAATGAGTTTGTTCATAT   | CAGCAGCAAAGTTGTTATTCA  | CACCCCTGGACTCATTGAGAA  | CTGGTTTGGTCAGATCCTGAA  |
| PR48     | protein phosphatase 2A 48 kDa regulatory subunit                                                        | -50 | 212 | CACGTGTCTCTGTACAGTGAA   | CTGGCCTGAGTGAGCAGTAA   | TGCGTTTGTACGGAATGATAA  | CACCTTCTTCAACATCGAGAA  |
| PSPH     | phosphoserine phosphatase                                                                               | +2  | 25  | CCGGCATAAAGGAGCTGGTAA   | TGCCAATAGGCTGAAATCTA   | TAGGCTGAAATTTACTTTAA   | CAGAGACTCATAGCAGAGCAA  |
| PSTPIP1  | proline-serine-threonine phosphatase interacting protein 1                                              | -8  | 183 | ACCGGGCGCTCTACGATTATA   | CCGGCTGACCATTCTCCGCAA  | CAGCATAGACGCCGACATCGA  | CAAGAAGGCCATGGAGTCCAA  |
| PSTPIP2  | proline-serine-threonine phosphatase interacting protein 2                                              | 8   | 115 | CCACGTTTATGTCAGCAATGAA  | CCGGCTAGTGCTTCTGTGATA  | CTCAGTGGTGCAAGATTTAAA  | ACGAATAAACTTCTTCCGGAA  |
| PTEN     | phosphatase and tensin homolog (mutated in multiple advanced cancers 1)                                 | -17 | 195 | AAGATTTATGATGCACTTATT   | CAATTTGAGATTTCTACAGTAA | ACGGGAAGACAAGTTTATGTA  | TCCGGCTTCTCTGAAAGGGAA  |
| PTP4A1   | protein tyrosine phosphatase type IVA, member 1                                                         | 8   | 116 | ACGCCTTAAACACAGCTCTATA  | CCCTTTGATCACGTTAATCTA  | CCGACCCGTTGCCATGATTTAA | CACGTTAATCTAAATCTAGAT  |
| PTP4A2   | protein tyrosine phosphatase type IVA, member 2                                                         | 8   | 117 | AACAGCATACCTGCTAAGCTA   | CAGAGAATGCTGGTAGCTTAA  | ATGCAACAATAGATTTCCATTA | AGGGACTGTGTTGCTTGTGAA  |
| PTP4A3   | protein tyrosine phosphatase type IVA, member 3                                                         | 23  | 66  | CACCCAAGTATTTGCACAATA   | CCGCGGAGCCATCAACAGCAA  | CACCTTCAATTGAGGACCTGAA | CCGGTGGAGGTGAGCTACAAA  |
| PTPDC1   | protein tyrosine phosphatase domain containing 1                                                        | 17  | 88  | CGGAATGTTGAGTGCCCTCAA   | TACGTAGATACCAGAGGCCAA  | AGGCTATACATAAGTATTGTA  | AACAGAGGGTTTCAAAGCATA  |

|           |                                                                                              |     |     |                         |                        |                        |                        |
|-----------|----------------------------------------------------------------------------------------------|-----|-----|-------------------------|------------------------|------------------------|------------------------|
| PTPLA     | protein tyrosine phosphatase-like (proline instead of catalytic arginine), member a          | 17  | 89  | ACCACTTGCCATACTTCATTA   | CACTGTTTAATTGGAATTGTA  | CTGGTGAACFTCTTACAATAT  | AAGTGAGTTCAAGAATCTTTA  |
| PTPLB     | protein tyrosine phosphatase-like (proline instead of catalytic arginine), member b          | 8   | 118 | CACGGCGTACCTGGTCATCTA   | CAGCCAAGAAATAGTTTGGTA  | TACGCTTAACFTTCTATGCAT  | TCCTATGTTAATTTCCACCAA  |
| PTPN1     | protein tyrosine phosphatase, non-receptor type 1                                            | 25  | 58  | CACGTGGGTATTTAATAAGAA   | CAGGCATGCCCGGTAGGTAA   | CAGGAATAGGCATTTGCCTAA  | ACGGACGTTGGTTCTGCACTA  |
| PTPN11    | protein tyrosine phosphatase, non-receptor type 11 (Noonan syndrome 1)                       | 75  | 5   | CAGAAGCACAGTACCGATTTA   | CCGCTCATGACTATACGCTAA  | GCGGTCCAGCATTATATGAA   | GCCGCTCATGACTATACGCTA  |
| PTPN12    | protein tyrosine phosphatase, non-receptor type 12                                           | 50  | 18  | AAGCTTAATGAGAAATATCA    | TTGCAGGTTATCAGAGATCAA  | CTGCTGTAGACATGTTAATA   | GTGGATCATGATAACACTTCA  |
| PTPN13    | protein tyrosine phosphatase, non-receptor type 13 (APO-1/CD95 (Fas)-associated phosphatase) | 83  | 4   | CGGTCTATTCTTACTAAGAAA   | TCCAGGTACATTAAGATGAA   | TCGATGGATAAGTATCATATA  | AACCTTTGGATCAGTGTCTAA  |
| PTPN14    | protein tyrosine phosphatase, non-receptor type 14                                           | 58  | 11  | AAGGGCGATTACGATGTACAT   | CGGTGTGGCATTTACAATATA  | CTGGCCAAACTAGGTFCAAA   | TCGGTGGAAAGCACAGGGCAA  |
| PTPN18    | protein tyrosine phosphatase, non-receptor type 18 (brain-derived)                           | 69  | 6   | CAGGCAGACATCAGTCCACAT   | CCCAATGACTGTAGCATTCAA  | GTGGCCCTGGATCAAAGTTAA  | CCGGGTGTAAGTCTAACGCCA  |
| PTPN2     | protein tyrosine phosphatase, non-receptor type 2                                            | 0   | 167 | AACTGTATTACATACATGTCAA  | CCGCTGTACTTGGAAATTCGA  | TCGATTGAATTGTTACTGGATA | CACAAAGGAGTTACATCTTAA  |
| PTPN21    | protein tyrosine phosphatase, non-receptor type 21                                           | 8   | 119 | GAGGAGACCATTCAA'TTCAA   | GTGCATAGATTTCTATCTTAA  | AAGCACCTCCTTACC GGCAA  | CCCACCGCAGTTGCACATATA  |
| PTPN22    | protein tyrosine phosphatase, non-receptor type 22 (lymphoid)                                | 8   | 120 | CCGGGTAGAACTATCCCTGAT   | TGGGATGTACGTTGTTACCAA  | CCCAGGTCCTTTTATCTACAA  | TACGTAATGCCTCTAATGTAA  |
| PTPN23    | protein tyrosine phosphatase, non-receptor type 23                                           | -25 | 202 | AACCTTGTACAGTCCATGCAA   | CCGCCAGATCCTTACGCTCAA  | CTGCGTGAGCTTATCCAGAAA  | CCGGCCCGACACTGTCCAGGAA |
| PTPN3     | protein tyrosine phosphatase, non-receptor type 3                                            | 8   | 121 | CAGGTTATTTCAGCGATAGTTA  | CCGGGTATTATTG CAGGAAA  | CCGAGAAATGCTGGTCACAAA  | CCGCTCATTTGCTGACTTCAA  |
| PTPN4     | protein tyrosine phosphatase, non-receptor type 4 (megakaryocyte)                            | 67  | 8   | CTCCGAACAAATAGTAAATA    | TCCGTCATCAACACAAGCTAA  | CTCCGTATCAACACAAGCTA   | AGCACGTACCTTAGAACTCTA  |
| PTPN5     | protein tyrosine phosphatase, non-receptor type 5 (striatum-enriched)                        | 0   | 168 | ATCGAGGAGATGAACGAGAAA   | CACCAACATCGAGGAGATGAA  | CAGCTGAGGGAGAGTTCTCTA  | CCCTCTGAGTTCTCATACATA  |
| PTPN6     | protein tyrosine phosphatase, non-receptor type 6                                            | 25  | 59  | CCGGAACAAATGCGTCCCATATA | TAGGCCCTGATGAGAACGCTA  | CCGCACCTCGTCCAACACAA   | CCAGTTCATTGAAACCACTAA  |
| PTPN7     | protein tyrosine phosphatase, non-receptor type 7                                            | -50 | 213 | CAGGTCTACCTCAGGACTGAA   | CTGGCATTTATGACAGACAAA  | AAGCTCCAGAACAGTAACCAA  | CACCCATGTGTCATAAGAGTA  |
| PTPN9     | protein tyrosine phosphatase, non-receptor type 9                                            | 0   | 169 | ACCAAAC TAGAGTAAGCTAA   | AGGAACGGAGCGAATAATATA  | CCAGTAGCAATGTGTCTTAA   | CAAGTGGACAGTTTCACTACAA |
| PTPNS1    | protein tyrosine phosphatase, non-receptor type substrate 1                                  | 15  | 92  | CGCCTGTAAATTACTGAGAAA   | CTCGCTGTGGACGCTGTAAA   | ACGCCGTAAATTTACTGAGAA  | CCCGAGAAGATGCCAGAGAA   |
| PTPNS1 L2 | protein tyrosine phosphatase, non-receptor type substrate 1-like 2                           | 0   | 170 | CAGGGCCAAACCGAAATTTAA   | CCGGAAATTAATCTACAATTT  | AAGGTAACFTTCCAGAGTAA   | AAGCTCCAGGTTTCCACCACAA |
| PTPRA     | protein tyrosine phosphatase, receptor type, A                                               | 42  | 26  | CAGAGTGATCATTTCCAGTTAA  | CCGGAGAAATGGCAGACGACAA | CAGGTGTAGGGCGTACAGGTA  | AGGCATTTACAATTTCCACAAA |
| PTPRB     | protein tyrosine phosphatase, receptor type, B                                               | 8   | 122 | CCCGGAGATGTGGATAACTAT   | CCGGTCGACTTTATCAAGTTA  | TCGGGTGTATCAGACTAATTA  | CCAGTATTAGTGGAGACTTAA  |
| PTPRC     | protein tyrosine phosphatase, receptor type, C                                               | 8   | 123 | AACCGTTATGTGACATTTCTT   | AAGAA'TGCGATTTCCGTGTA  | TCGATTATTTCCCTGTACAATA | CAACTTCTTTGTAATCGTTAT  |
| PTPRD     | protein tyrosine phosphatase, receptor type, D                                               | -17 | 196 | ACGGCCAGTCCCGAACAGTAA   | CTGGGTGTCATTGAAGCAATA  | CGCCTTGTTAATATTTATGCCA | ATGGCATTATCACCAAGTATA  |
| PTPRE     | protein tyrosine phosphatase, receptor type, E                                               | 25  | 60  | ACCACGGGCAATTTAACTTTA   | CCGAGTGATCCTTTCCATGAA  | CAGTGAATTCACAACCTGAA   | GACCATCGTCATGTTAACAAA  |
| PTPRF     | protein tyrosine phosphatase, receptor type, F                                               | 0   | 171 | CAGCGCTATCTAGATAGGTAA   | CATCGTGT'TTGC AAAGTTAA | CCGAGGACTATGAAACCACTA  | CAGGAGCGGATCATCATGTAT  |
| PTPRG     | protein tyrosine phosphatase, receptor type, G                                               | 25  | 61  | AGGGTGAAGTTAAGACCTTTA   | TCGGTGAGCTCTATTCTAATA  | TAGGCACTGTTCAATACTGTA  | CAGACTCTAGGTTATACAATA  |
| PTPRH     | protein tyrosine phosphatase, receptor type, H                                               | 0   | 172 | CCGGGACGTTGTACAATTTCA   | CCGGGTCAATGTATACGTGTT  | CAGGTACTGACATCACCTTAA  | TCGAAGCACAGCACACACTAA  |
| PTPRJ     | protein tyrosine phosphatase, receptor type, J                                               | 33  | 38  | TCCGAGTATGTC'TACCATTTA  | TCGGGTAGAAATAACCACCAA  | ACGAGTCGTATCTAACTATA   | ACCCGTATCTTCTACAATCAA  |
| PTPRK     | protein tyrosine phosphatase, receptor type, K                                               | 25  | 62  | CCGGGTTAAATGCTATAAATA   | CTGGAGATTAGTGTATGATTA  | CCGGCGAGTCAAGTTATCAAAA | CAGGATTTGTATCGCTGTGTA  |
| PTPRM     | protein tyrosine phosphatase, receptor type, M                                               | 8   | 124 | AAGGGTCAAATGCTGCAATA    | CACATCCGTAGTTATGCTAAA  | CAGGATATTTCCGATTTACAA  | CACCTTTGAATCAAACCTGACA |
| PTPRN     | protein tyrosine phosphatase, receptor type, N                                               | 8   | 125 | CACCC'TTCACTGAGTTACGAA  | CAGGTCTGGCTTGGCACCCAA  | CAGGAAGGTGAACAAGTGCTA  | CTGGTGAAGTCTGAACTGGAA  |
| PTPRN2    | protein tyrosine phosphatase, receptor type, N polypeptide 2                                 | 25  | 63  | AAGGTGCTAAAGAGATTGATA   | CAGCGCAGTTTAGCAGTTAAA  | AGCGGACAGAATGATGCCAAA  | ACGGATGTTGTGAGGAATCAT  |

|         |                                                                                                |     |     |                       |                        |                        |                       |
|---------|------------------------------------------------------------------------------------------------|-----|-----|-----------------------|------------------------|------------------------|-----------------------|
| PTPRR   | protein tyrosine phosphatase, receptor type, R                                                 | 17  | 90  | CGCCACCAGATTGTCAATTCA | TCGCCCTCATTGGAAAGAAGAA | TAGGTTTATCACACAGCCTAA  | AACCCCTTGTGTCTATACCAA |
| PTPRS   | protein tyrosine phosphatase, receptor type, S                                                 | 100 | 1   | CACGGCATCAGGCGTGCACAA | CGCGTCTACTACACCATGGAA  | CAGGACATTCTCTCTGCACAA  | AAGAACAACCCGACAGTAAA  |
| PTPRV   | protein tyrosine phosphatase, receptor type, V                                                 | 50  | 19  | AACGCTGAAGCAGTATATCTA | AAGGTGGGCAGTCATGTCCAA  | ATCCCTTTCATGGGCATAAA   | ATGCCACAGAGTGGACCTATA |
| PTPRZ1  | protein tyrosine phosphatase, receptor-type, Z polypeptide 1                                   | 42  | 27  | ACGCTGGAATTTGGTAGTGAA | TAGCCATATACCAATACCTAA  | CCGCCAAATTTATATCATTTAA | CAGACTAATTACACTGAGATA |
| RNGTT   | RNA guanylyltransferase and 5'-phosphatase                                                     | 33  | 39  | CAGGGTTGTTAAGTTGTACTA | CGGGATTTCTATATGGACATA  | TACCATCTGCAGTATTATAAA  | ATGGATTTAAAGGCGGCTAA  |
| SGPP1   | sphingosine-1-phosphate phosphatase 1 skeletal muscle and kidney enriched inositol phosphatase | 0   | 173 | AGAGATTAACCTTCCATATAA | ATCGGTATATTACCTATGGAA  | CTGCCATTACCTTTCATGTTA  | TGCGTAATTACTAGACCAGAA |
| SKIP    | phosphatase                                                                                    | -33 | 207 | CAGCCAAGTGTCTGCCACATA | CTGGAATTAGCCGCTTAAATA  | CACGTTGACTTGGAGCTGAA   | ACGGTCGGAGTCCGGAAGAAA |
| SNAP23  | synaptosomal-associated protein, 23kDa SH2 domain containing phosphatase                       | 0   | 174 | CTGGCAAGGCTTATAAGACAA | CAGGCCATTAAACATCATACA  | TACCACATGAATTCAGATTTA  | AAGAGGTTGTTACCTCAGTAA |
| SPAP1   | anchor protein 1                                                                               | 42  | 28  | TCAGAAGATGGCTTACCATAA | TTCAAATATAGTAAAGATAAA  | CAGGACCTGATGGCTATAGAA  | ATGCCGGCAAATATTACTGTA |
| TA-PP2C | T-cell activation protein phosphatase 2C                                                       | 17  | 91  | AAAGGGATGGTACAAGTCTAA | CACAAATTGTACGTAATGATA  | CCCTCAAAGCCTAGAAATTTA  | CTCAATTCTCAGGGACTTTAA |
| TENC1   | tensin like C1 domain containing phosphatase                                                   | -8  | 184 | ACAGCACGTGGTCGTACTATA | CAAGGTGGCGACGCACAGAAA  | ACGGCCATCCTAGATGACGAA  | CTCGGTCTCTGTGACTACAA  |
| TPTE    | transmembrane phosphatase with tensin homology                                                 | 25  | 64  | CAGATTGGCAACCAAGACTAA | CTGAAATATGTTCAACTGCAA  | TCGGTACTTGATAACATTACA  | CAGACTTGTGTTATTCTAGCA |
| TPTE2   | transmembrane phosphoinositide 3-phosphatase and tensin homolog 2                              | 25  | 65  | ACCTGGAGAACTGATAATAAA | CTGATAATAAATTTGTGGTTTA | ACAGGCAAATTTCAGAAACAA  | AATGATTGAAATAGAGCTATA |
